# Supplementary material
Source: HighWire-hosted journal article supplement (https://gut.bmj.com/content/71/11/2179)

A Gating strategy

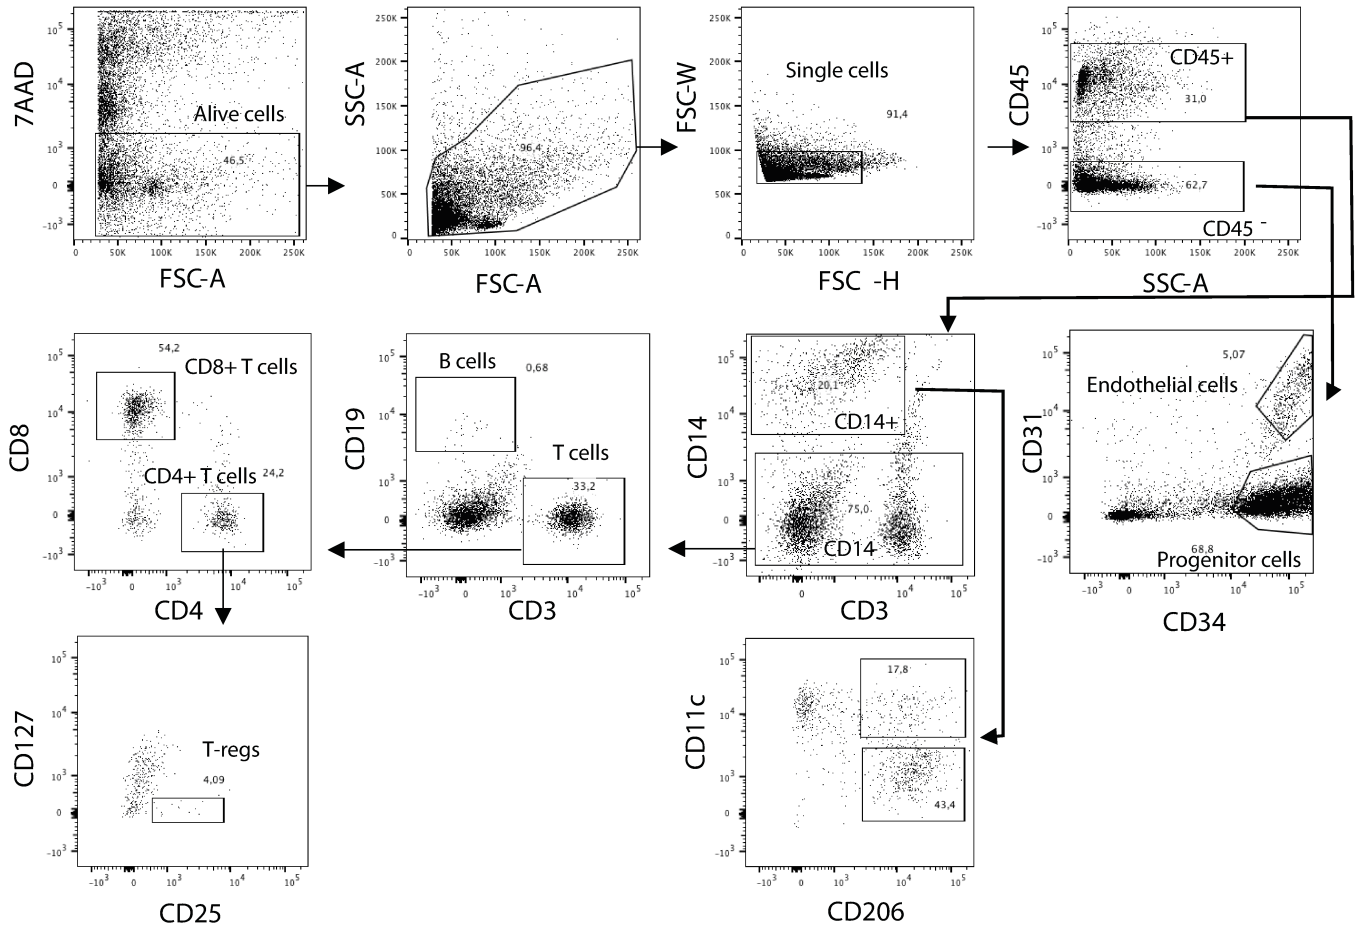

B FACS results for remaining cluster

C Example image MRI-based quantification approach

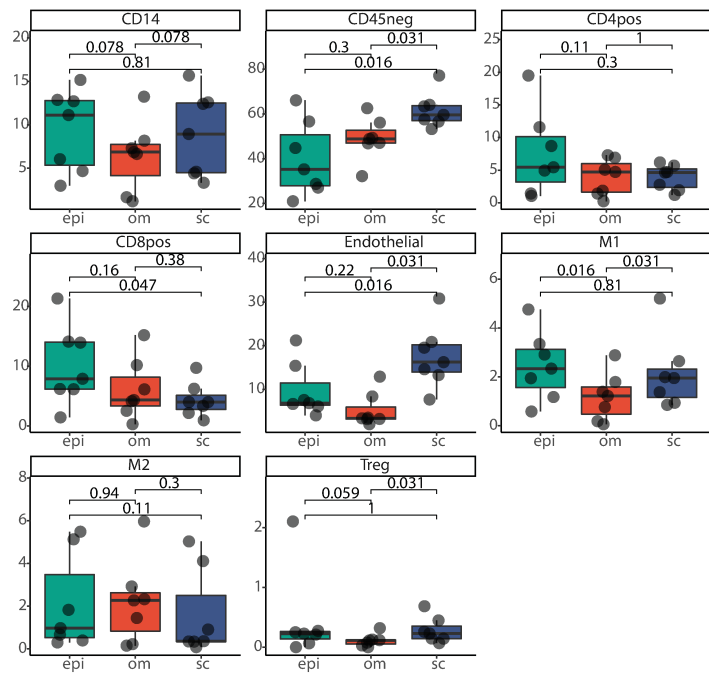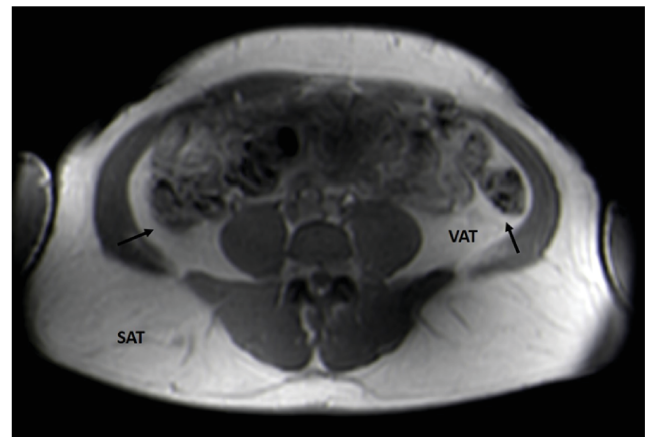

Supplement: inline-supplementary-material-6 [file inline-supplementary-material-6.pdf]
