# Supplementary material
Source: HighWire-hosted journal article supplement (https://gut.bmj.com/content/71/11/2179)
Supplement: inline-supplementary-material-8 [file inline-supplementary-material-8.xlsx]

## Sheet: EpiVsOtherAT
	Epiploic					Mesenteric						Omental						Subcutaneous
	N	Mean	25th	50th (Median)	75th	N	Mean	25th	50th (Median)	75th	p Epi vs Mes	N	Mean	25th	50th (Median)	75th	p Epi vs Om	N	Mean	25th	50th (Median)	75th	p Epi vs Sc
CASP1	69	0.209957	0.1385	0.197	0.236	70	0.128386	0.094	0.115	0.14125	6.76096e-09	70	0.125057	0.09475	0.1145	0.14625	4.0728e-10	70	0.0998571	0.0715	0.091	0.1135	8.42667e-12
IL1B	69	0.00836232	0.004	0.006	0.0105	70	0.00814286	0.003	0.004	0.00825	0.0140516	70	0.00907143	0.00475	0.007	0.01125	0.577988	70	0.00738571	0.003	0.005	0.009	0.246193
IL6	69	0.0154928	0.007	0.012	0.0195	70	0.018	0.006	0.01	0.017	0.291147	70	0.0235286	0.008	0.014	0.02125	0.384668	70	0.0159571	0.005	0.0085	0.0135	0.0213122
INFG	68	7.66029e-05	2.725e-05	5.15e-05	0.0001135	65	6.13846e-05	1.5e-05	3.1e-05	6.5e-05	0.00256163	70	6.69286e-05	2.075e-05	4.05e-05	8.15e-05	0.0494571	67	3.9806e-05	1.6e-05	2.9e-05	4.6e-05	9.37946e-06
TNFA	69	0.00456522	0.002	0.004	0.006	70	0.00588571	0.002	0.004	0.006	0.434136	70	0.00398571	0.002	0.004	0.006	0.0441565	70	0.00485714	0.003	0.004	0.006	0.583743
CCL2	69	0.0632464	0.027	0.055	0.0795	70	0.0660714	0.02575	0.0455	0.065	0.0501557	70	0.0835	0.045	0.0655	0.0915	0.13186	70	0.0903	0.04075	0.06	0.091	0.112557
ADIPOQ	69	3.77088	2.1375	3.175	4.3765	70	3.15657	1.84525	2.6615	3.492	0.011242	69	2.16645	1.254	2.046	2.473	1.58258e-07	70	2.84547	1.39275	2.5305	3.99625	0.00472729
CEBPA	69	0.67329	0.4935	0.622	0.8195	70	0.462629	0.322	0.448	0.57275	9.99312e-09	70	0.366414	0.249	0.3285	0.45775	5.64097e-11	70	0.480329	0.25775	0.447	0.68875	1.64997e-06
RARRES2	69	4.34068	3.126	3.922	5.067	70	2.53479	1.902	2.297	3.069	8.43564e-12	70	2.53677	2.03075	2.437	3.0845	2.27806e-12	70	2.0797	1.1915	1.9575	2.69475	3.63809e-12
LEPR	69	0.697884	0.457	0.647	0.923	70	0.601043	0.35125	0.4405	0.696	0.00278043	70	0.378543	0.171	0.294	0.48625	6.37391e-08	70	0.607629	0.2945	0.491	0.83225	0.130359
PGC1A	67	0.0370448	0.028	0.038	0.046	70	0.0309571	0.019	0.025	0.041	0.00119772	70	0.0377	0.024	0.0325	0.042	0.81959	70	0.0239857	0.012	0.02	0.029	2.65911e-06
PPARG	69	0.340768	0.261	0.32	0.403	70	0.219029	0.1665	0.2065	0.265	1.29686e-10	70	0.199714	0.143	0.178	0.24775	1.9269e-11	70	0.188414	0.1225	0.1775	0.25925	1.75853e-12
GRN	69	0.932754	0.7535	0.914	1.067	70	0.589157	0.43175	0.547	0.6945	1.13084e-10	70	0.4781	0.308	0.458	0.599	4.6876e-12	70	0.596743	0.3805	0.52	0.775	8.52538e-10
SREBP1C	69	0.124072	0.0745	0.104	0.158	70	0.120629	0.0715	0.092	0.1525	0.38105	70	0.0740714	0.04025	0.068	0.10225	6.59831e-08	70	0.114257	0.04875	0.095	0.16375	0.240702
LEP	69	1.91781	1.1597	1.70369	2.31971	68	0.347458	0.145512	0.24421	0.352736	1.8788e-11	70	0.066925	0.0334893	0.0535276	0.0962623	5.21493e-13	70	0.0244571	0.0104893	0.0156141	0.0268323	5.21493e-13

## Sheet: EpiISvsIR
		Percentiles
Gene	Group	25th	50th	75th	p
CASP1	noD	0.13475	0.188	0.21925
	T2D	0.15275	0.2055	0.25025	0.193124
IL1B	noD	0.004	0.006	0.00925
	T2D	0.00325	0.0065	0.012	1
IL6	noD	0.007	0.0115	0.01425
	T2D	0.0075	0.0145	0.02325	0.227468
INFG	noD	2.775e-05	5e-05	8.675e-05
	T2D	2.175e-05	4.8e-05	0.000114	0.691461
TNFA	noD	0.00275	0.004	0.006
	T2D	0.002	0.004	0.007	0.709107
CCL2	noD	0.03625	0.06	0.07525
	T2D	0.026	0.0545	0.0925	0.400087
Adionectin	noD	2.45025	3.2915	4.63175
	T2D	1.83225	2.6805	3.7425	0.137863
CEBPA	noD	0.54775	0.627	0.851
	T2D	0.43575	0.5805	0.748	0.103404
Chemerin	noD	3.36625	4.072	5.7375
	T2D	3.03425	3.828	4.27875	0.0632031
LeptinR	noD	0.4215	0.613	0.9085
	T2D	0.4885	0.6255	0.971	0.293933
PGC1A	noD	0.0305	0.0395	0.04825
	T2D	0.02225	0.036	0.04375	0.392727
PPARG	noD	0.29725	0.3585	0.41825
	T2D	0.24075	0.2945	0.364	0.0294389
Progranulin	noD	0.75475	0.885	1.0735
	T2D	0.67425	0.911	1.04175	0.985562
SREBP1C	noD	0.086	0.1215	0.182
	T2D	0.055	0.09	0.12475	0.0138465
LEP	noD	1.04607	1.64281	2.17547
	T2D	1.30904	2.07122	2.61898	0.0703723
