# Supplementary material
Source: HighWire-hosted journal article supplement (https://gut.bmj.com/content/71/11/2179)

## A Outliers Transcriptome

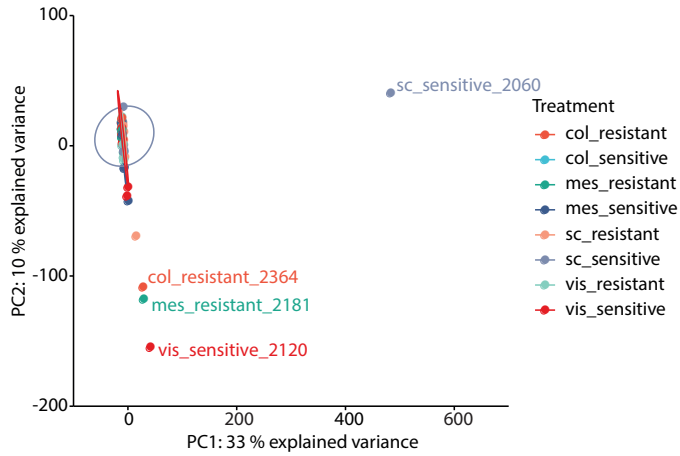

## B Outliers Proteome

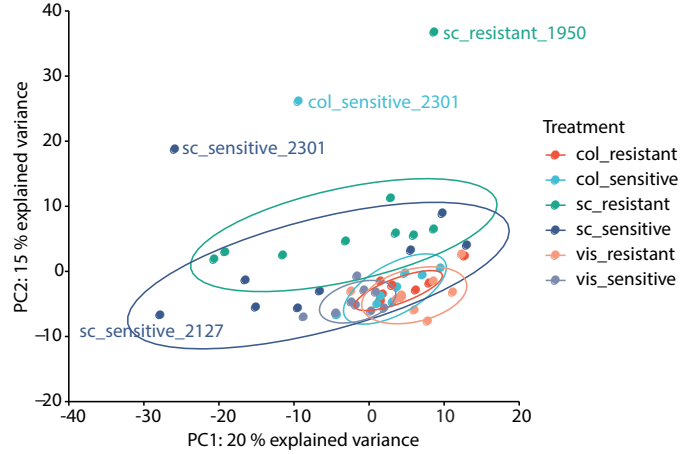

## C Gene set enrichment using KEGG pathways: Epi Vs Sc

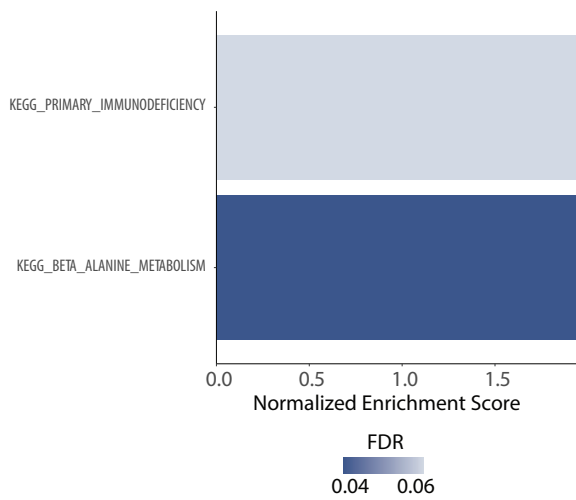

## D Gene set enrichment using KEGG pathways: Epi Vs Mes

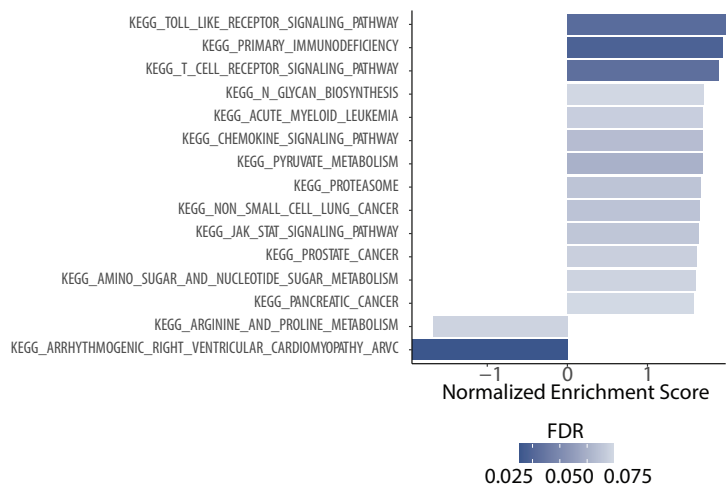

## E Adipocyte-specific LEP expression

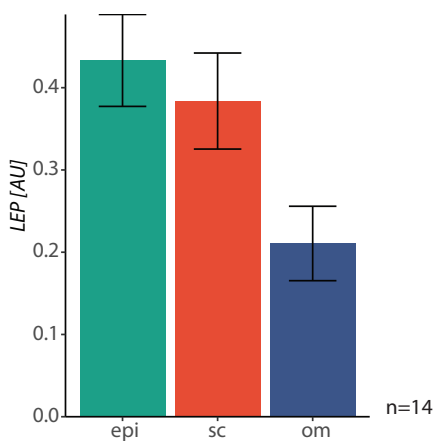

## F Depot-specific expression of highlighted genes

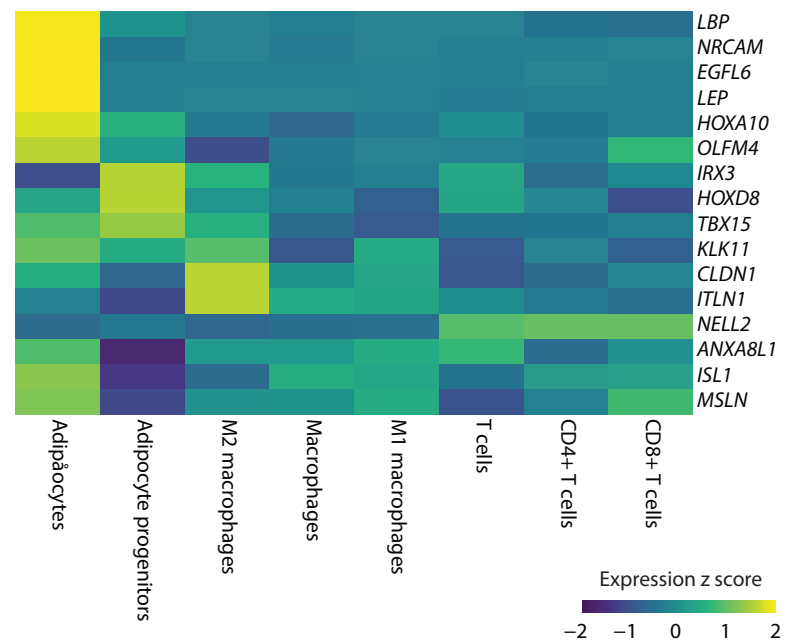

Supplement: inline-supplementary-material-9 [file inline-supplementary-material-9.pdf]
