# Supplementary material
Source: HighWire-hosted journal article supplement (https://gut.bmj.com/content/71/11/2179)

## A epiploic vs omental adipose tissue

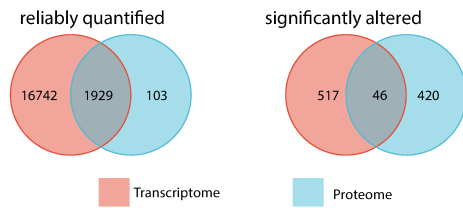

## B Perdikari et al.

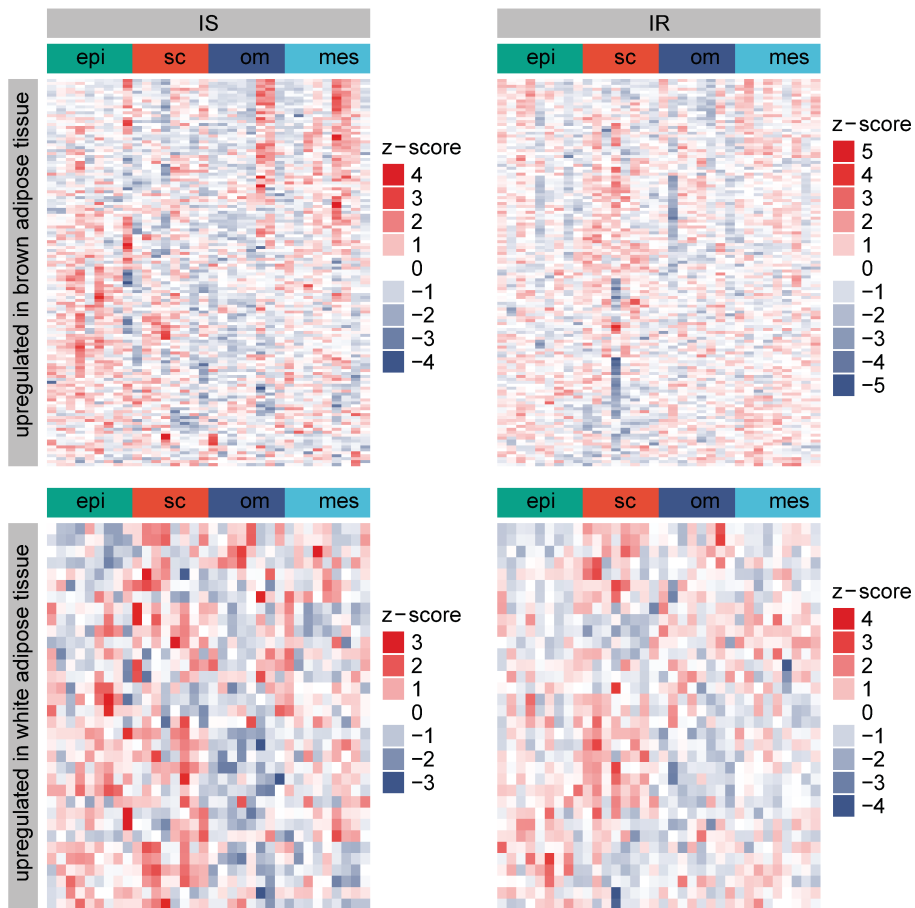

## C Pilkington et al.

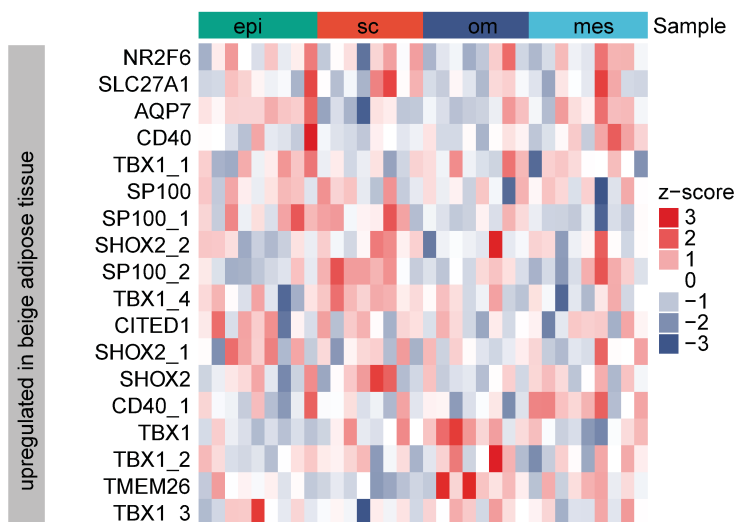

Supplement: inline-supplementary-material-13 [file inline-supplementary-material-13.pdf]
