# Supplementary material
Source: HighWire-hosted journal article supplement (https://gut.bmj.com/content/71/11/2179)

## A Epiploic: gene set enrichment between patient groups using KEGG

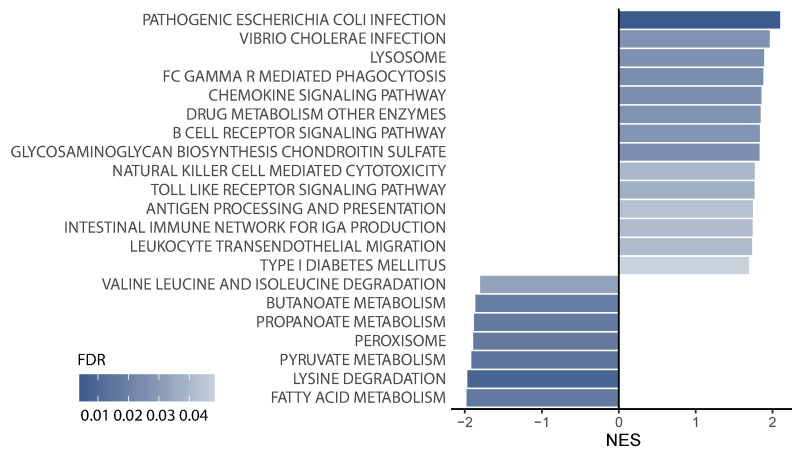

## B FACS comparison noT2D vs T2D

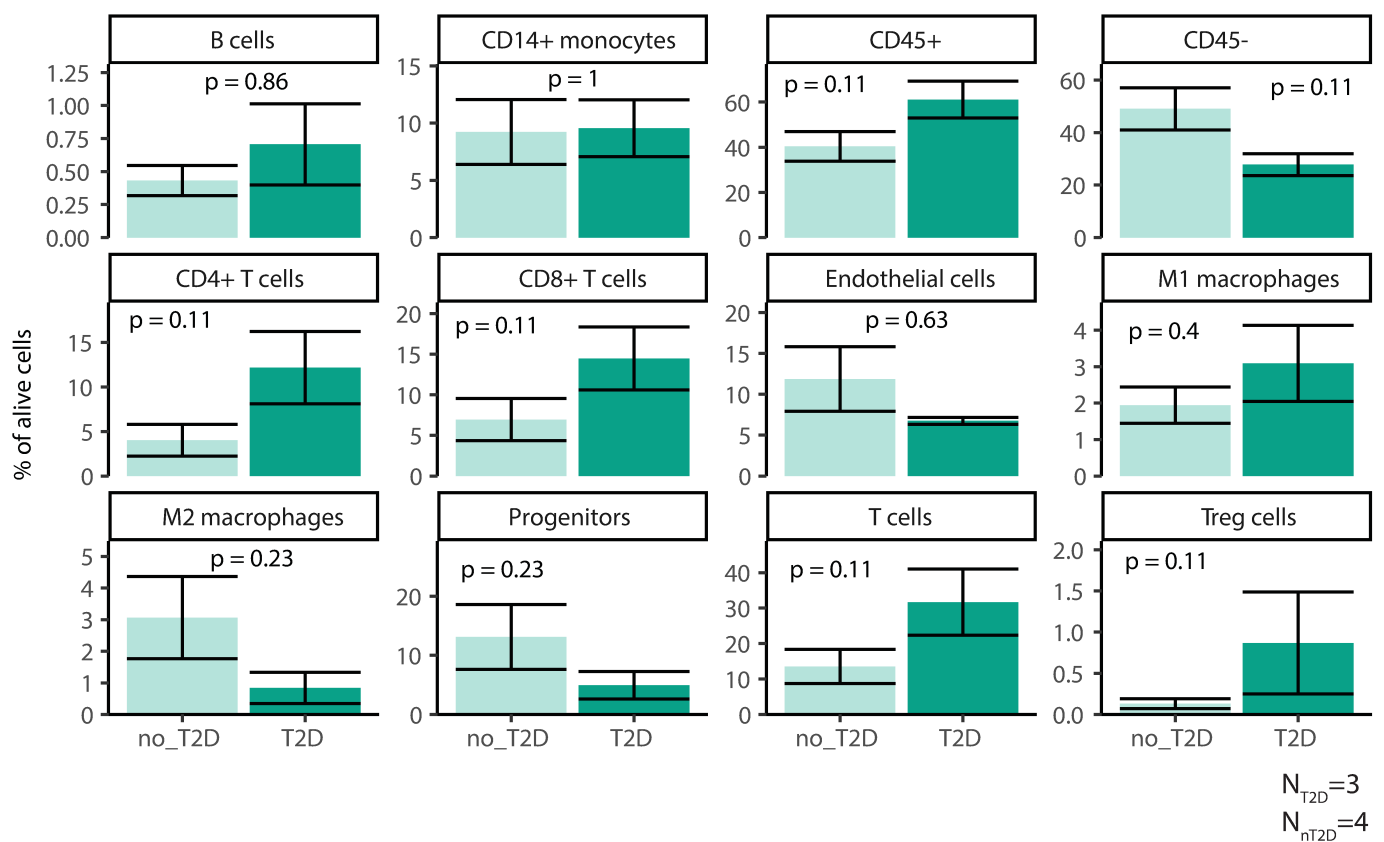

Supplement: inline-supplementary-material-15 [file inline-supplementary-material-15.pdf]
