# Supplementary material
Source: HighWire-hosted journal article supplement (https://gut.bmj.com/content/71/11/2179)
Supplement: inline-supplementary-material-17 [file inline-supplementary-material-17.pdf]

| Trait                    | No T2D (n=8)  | T2D (n=6)      |
|--------------------------|---------------|----------------|
| Sex (female/male)        | 5/1           | 5/3            |
| Age (years)              | 46.67 ± 3.98  | 51.50 ± 4.18   |
| BMI (kg/m <sup>2</sup> ) | 44.72 ± 1.26  | 46.63 ± 1.69   |
| FPG (mmol/l)             | 5.4 ± 0.21    | 10.08 ± 1.12   |
| FPI (pmol/l)             | 99.27 ± 21.78 | 141.48 ± 29.44 |
| CRP (mg/l)               | 10.68 ± 3.74  | 9.77 ± 2.86    |

Table S12: Patient characteristics of adipocyte-specific expression cohort, mean ± standard deviation
