# Supplementary material
Source: HighWire-hosted journal article supplement (https://gut.bmj.com/content/71/11/2179)

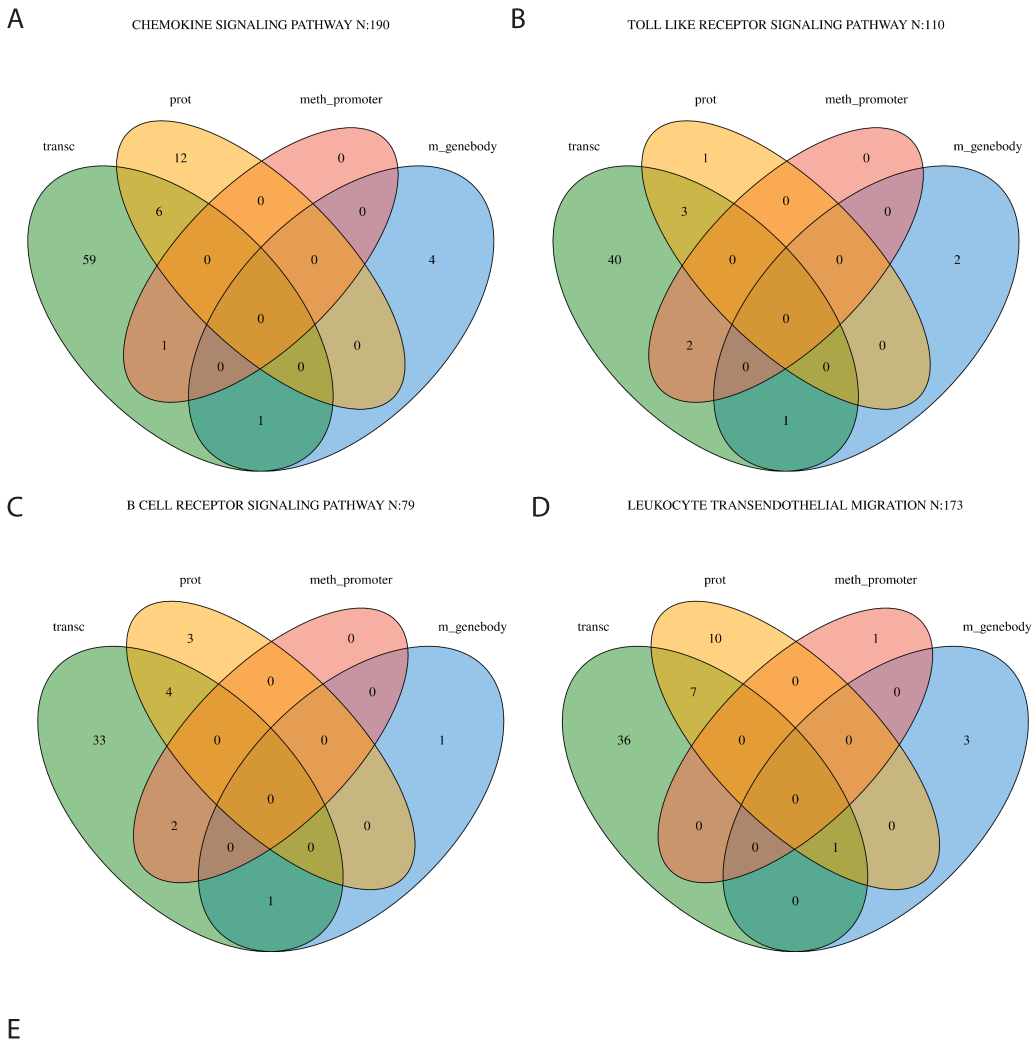

All Genes in Significant Pathways (N: 1100)

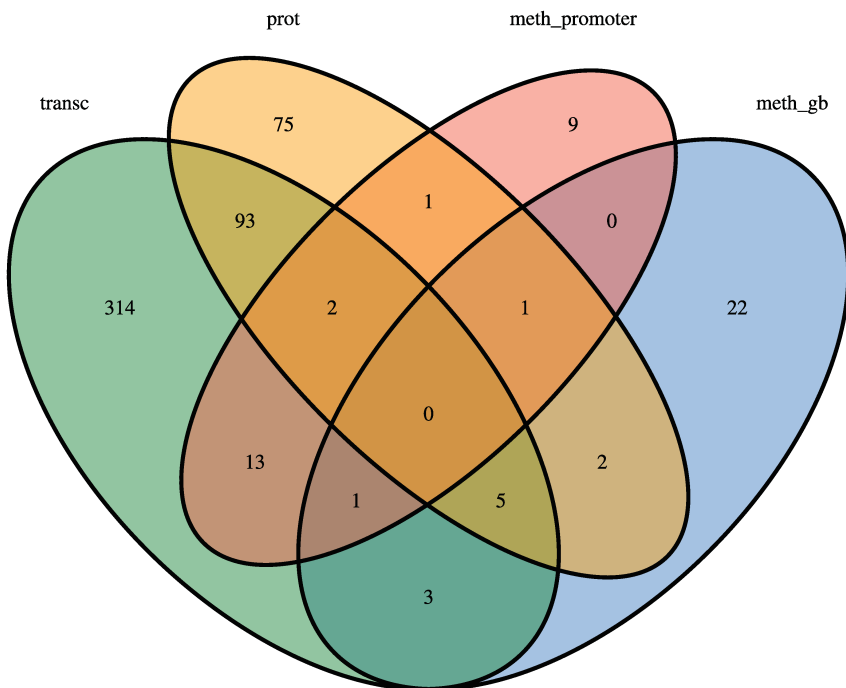

Supplement: inline-supplementary-material-16 [file inline-supplementary-material-16.pdf]

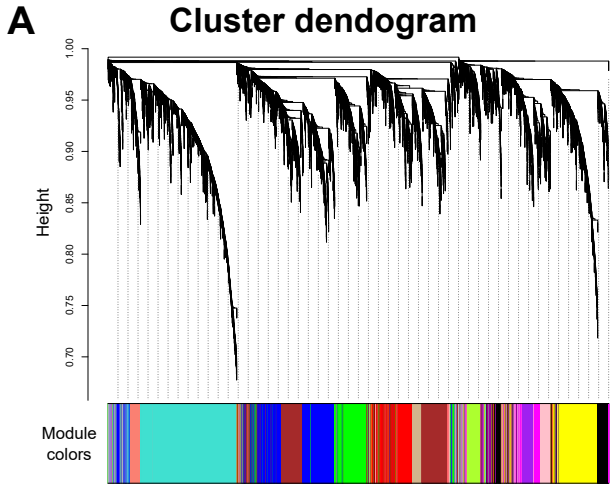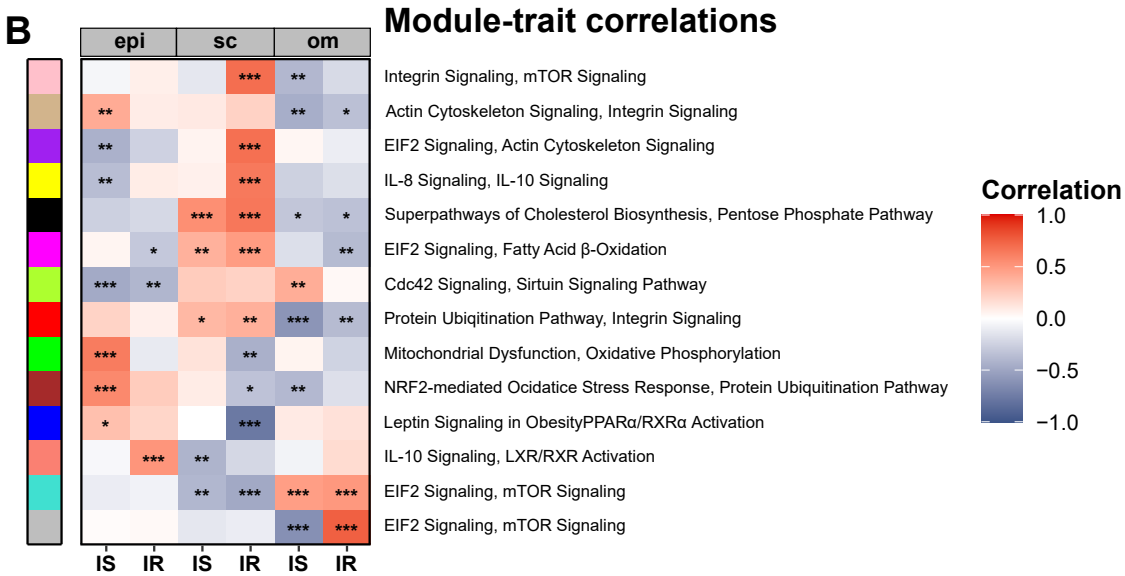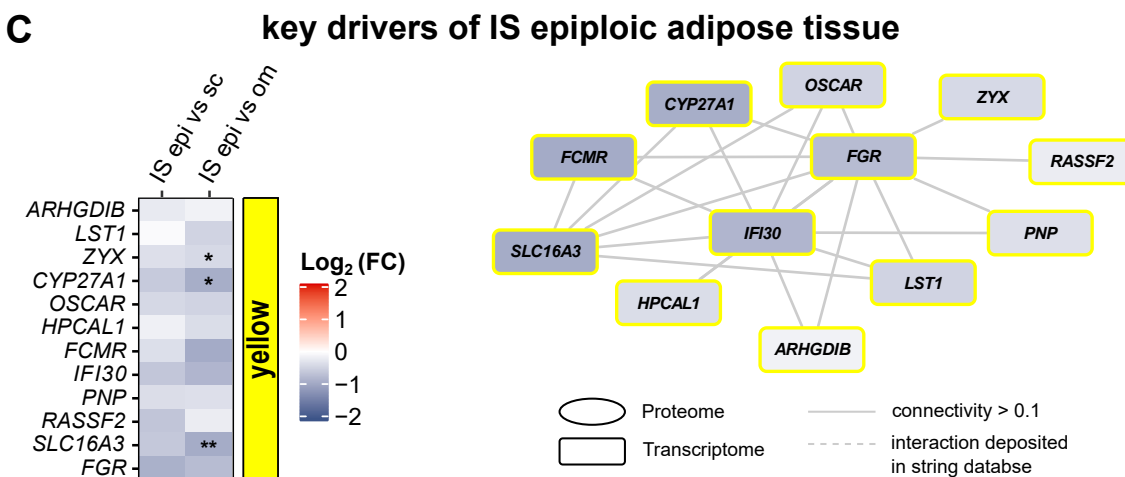

Supplement: inline-supplementary-material-18 [file inline-supplementary-material-18.pdf]
